# Supplementary material for: [NH3(CH2)4NH3]SnX4 (X = Br, I): Dion–Jacobson type 2-D perovskites with short interlayer spacing
Source: Royal Society of Chemistry journal article supplement (doi:10.1039/d3dt03772j), 2024-01-01
Supplement: d3dt03772j1.pdf [file d3dt03772j1.pdf]

## Electronic Supplementary Information

### **[NH<sub>3</sub>(CH<sub>2</sub>)<sub>4</sub>NH<sub>3</sub>]SnX<sub>4</sub> (X = Br, I): Dion-Jacobson type 2-D Perovskites with Short Interlayer Spacing**

Nagale S. Vishwajith,<sup>a</sup> Mridul Krishna Sharma,<sup>a†</sup> Isha Jain,<sup>a†</sup> Pratap Vishnoi<sup>a\*</sup>

† MKS and IJ contributed equally.

New Chemistry Unit, International Centre for Materials Science  
Jawaharlal Nehru Centre for Advanced Scientific Research,  
Jakkur P. O., Bangalore-560064, India  
E-mail: [pvishnoi@jncasr.ac.in](mailto:pvishnoi@jncasr.ac.in)

| <b>Content Table</b>                                                                                                                                      | <b>Page</b> |
|-----------------------------------------------------------------------------------------------------------------------------------------------------------|-------------|
| Materials                                                                                                                                                 | S3          |
| Synthesis of (1,4-BDA)SnBr <sub>6</sub> , (1,4-BDA)SnBr <sub>4</sub> , (1,4-BDA)SnI <sub>4</sub>                                                          | S3          |
| Single crystal X-ray diffraction                                                                                                                          | S4          |
| Powder X-ray diffraction                                                                                                                                  | S4          |
| UV-visible spectroscopic studies                                                                                                                          | S4          |
| X-ray photoelectron spectroscopy (XPS)                                                                                                                    | S4          |
| Field emission scanning electron microscopy (FESEM) and energy dispersive spectrometry (EDS) mapping                                                      | S4          |
| Photoluminescence spectroscopy                                                                                                                            | S4          |
| Thermogravimetric analysis (TGA)                                                                                                                          | S4          |
| Differential scanning calorimetry (DSC)                                                                                                                   | S4          |
| <b>Table S1.</b> Comparison of reported Dion-Jacobson type A <sub>2</sub> SnBr <sub>4</sub> and A <sub>2</sub> SnI <sub>4</sub> 2D compounds              | S5          |
| <b>Table S2.</b> Single crystal data and structure refinement details of (1,4-BDA)SnBr <sub>6</sub>                                                       | S5          |
| <b>Table S3.</b> Single crystal data and structure refinement details of (1,4-BDA)SnBr <sub>4</sub>                                                       | S6          |
| <b>Table S4.</b> Single crystal data and structure refinement details of (1,4-BDA)SnI <sub>4</sub>                                                        | S7          |
| <b>Table S5.</b> Bond distances & bond angles as obtained from the SCXRD data of the compounds reported in this study                                     | S8          |
| <b>Fig. S1.</b> Simulated and experimental powder X-ray diffraction patterns of (1,4-BDA)SnBr <sub>4</sub>                                                | S9          |
| <b>Fig. S2.</b> Simulated and experimental powder X-ray diffraction patterns of (1,4-BDA)SnI <sub>4</sub>                                                 | S10         |
| <b>Fig. S3.</b> Single-crystal structure of (1,4-BDA)SnBr <sub>6</sub>                                                                                    | S10         |
| <b>Fig. S4.</b> (a) and (b) are ball and stick models of the (1,4-BDA)SnBr <sub>4</sub> and (1,4-BDA)SnI <sub>4</sub> perovskite layers.                  | S11         |
| <b>Fig. S5.</b> Orientation of BDA in three different structures reported in this study.                                                                  | S11         |
| <b>Table S6.</b> Elemental ratio (atomic %) obtained from the EDS spectra.                                                                                | S11         |
| <b>Fig. S6.</b> Energy-dispersive X-ray spectra of (a) (1,4-BDA)SnBr <sub>4</sub> and (b) (1,4-BDA)SnI <sub>4</sub> .                                     | S12         |
| <b>Fig. S7.</b> XPS survey spectra of (a) (1,4-BDA)SnBr <sub>4</sub> and (b) (1,4-BDA)SnI <sub>4</sub> .                                                  | S13         |
| <b>Fig. S8.</b> Core level XPS spectra of (1,4-BDA)SnBr <sub>4</sub> (a) Nitrogen and (b) Carbon & (1,4-BDA)SnI <sub>4</sub> (c) Nitrogen and (d) Carbon. | S13         |
| <b>Fig. S9.</b> PXRD comparing the ambient stabilities of (1,4-BDA)SnBr <sub>4</sub>                                                                      | S14         |
| <b>Fig. S10.</b> PXRD comparing the ambient stabilities of (1,4-BDA)SnI <sub>4</sub>                                                                      | S15         |
| <b>Fig. S11.</b> TGA curves of (a) (1,4-BDA)SnBr <sub>4</sub> and (b) (1,4-BDA)SnI <sub>4</sub>                                                           | S15         |
| <b>Fig. S12.</b> DSC plots of (a) (1,4-BDA)SnBr <sub>4</sub> and (b) (1,4-BDA)SnI <sub>4</sub>                                                            | S16         |
| <b>Fig. S13.</b> Tauc plot for (1,4-BDA)SnBr <sub>6</sub>                                                                                                 | S16         |
| <b>Fig. S14.</b> Tauc plot for (1,4-BDA)SnBr <sub>4</sub>                                                                                                 | S17         |
| <b>Fig. S15.</b> Tauc plot for (1,4-BDA)SnI <sub>4</sub>                                                                                                  | S17         |
| <b>References</b>                                                                                                                                         | S18         |

## Experimental Section

**Materials.** 1,4-Butanediamine (Sigma Aldrich, 99%), Tin metal (Sigma Aldrich, <150  $\mu\text{m}$  particle size, 99.5% trace metal basis), 48 wt.% HBr in  $\text{H}_2\text{O}$  (Merck, India), 57 wt.% HI in  $\text{H}_2\text{O}$  (Merck, India) and 50 wt.%  $\text{H}_3\text{PO}_2$  in  $\text{H}_2\text{O}$  were purchased from commercial sources. All the compounds reported here were synthesised hydrothermally as single crystalline materials and structurally characterized from single crystal X-ray diffraction data.

**Synthesis of (1,4BDA)SnBr<sub>6</sub>.** 1,4-Butanediamine (87.70 mg, 101  $\mu\text{L}$ , 1.0 mmol) was added to a 23 mL Teflon vial containing Sn (118 mg, 1.0 mmol), (3mL) of 48 wt.% aqueous HBr and (110  $\mu\text{L}$ , 2.0 mmol) of  $\text{H}_3\text{PO}_2$  50 wt.% in  $\text{H}_2\text{O}$ . The Teflon vial was kept in a stainless-steel autoclave and heated in an oven at 160  $^\circ\text{C}$  for 24 hours. The reaction was cooled to room temperature at a cooling rate of 0.5 $^\circ\text{C}/\text{min}$ , yielding yellow crystals. The yellow crystals of (1,4-BDA)SnBr<sub>6</sub> were rapidly filtered out of the mother liquor, pressed with Whatman filter paper, and dried in a vacuum oven.

**Synthesis of (1,4-BDA)SnBr<sub>4</sub>.** 1,4-Butanediamine (87.70 mg, 101  $\mu\text{L}$ , 1.0 mmol) was added to a 23 mL Teflon vial containing Sn (118.0 mg, 1.0 mmol), (452  $\mu\text{L}$ , 4.0 mmol) of 48 wt.% aqueous HBr and 2 mL of  $\text{H}_3\text{PO}_2$  50 wt.% in  $\text{H}_2\text{O}$ . The Teflon vial was kept in a stainless-steel autoclave and heated in an oven at 200  $^\circ\text{C}$  for 2 hours. The reaction was cooled to room temperature by switching off the oven, and the Teflon vial was opened after 12 hours, which yielded yellow crystals. The yellow crystals of (1,4-BDA)SnBr<sub>4</sub> were rapidly filtered out of the mother liquor, pressed with Whatman filter paper, and dried in a vacuum oven.

**Synthesis of (1,4-BDA)SnI<sub>4</sub>.** 1,4-Butanediamine (87.70 mg, 101  $\mu\text{L}$ , 1.0 mmol) was added to a 23 mL Teflon vial containing Sn metal (118.0 mg, 1.0 mmol), (530  $\mu\text{L}$ , 4.0 mmol) of 57 wt.% aqueous HI, and 2mL of  $\text{H}_3\text{PO}_2$  50 wt.% in  $\text{H}_2\text{O}$ . The Teflon vial was kept in a stainless-steel autoclave and heated in an oven at 200  $^\circ\text{C}$  for 2 hours. The reaction was cooled to room temperature by switching off the oven, and the Teflon vial was opened after 12 hours, which yielded red crystals. The red crystals of (1,4-BDA)SnI<sub>4</sub> were rapidly filtered out of the mother liquor, pressed with Whatman filter paper, and dried in a vacuum oven.

**Single crystal X-ray diffraction.** Single crystals of each sample were mounted on a quartz fibre with the help of silicon grease on a Bruker D8 Venture diffractometer equipped with photon detector and graphite-monochromatic Mo-K $\alpha$  X-ray source (wavelength = 0.71073  $\text{\AA}$ ). Data were integrated by using APEX-3 software. XPREP was used to check for the possibility

of higher symmetry. The data were solved and refined by using SHELX 14.0<sup>S1</sup> and Olex2.<sup>S2</sup> All non-hydrogen atoms were refined anisotropically. The crystal structure figures were drawn by using VESTA 3.5.7.<sup>S3</sup>

**Powder X-ray diffraction.** Crystals were powdered in mortar and pestle before being placed in a PXRD sample holder. The PXRD data were collected on a Rigaku Smart Lab diffractometer equipped with a Cu-K $\alpha$  X-ray source (wavelength = 1.54059 Å).

**UV-visible spectroscopic studies.** Agilent Cary 5000 UV-VIS-NIR spectrophotometer instrument was used in reflectance mode, and reflectance in the range of 250-800 nm was obtained to determine the band gap.

**X-ray photoelectron spectroscopy (XPS).** The XPS data of the samples was collected on a Thermo Scientific K-Alpha X-ray photoelectron spectrometer equipped with a monochromatic, micro-focused, low-power Mg-K $\alpha$  X-ray source. The samples were powdered and then mounted on the XPS sample holder using double-sided copper tape. Survey scan spectra were measured in the 10 eV-1000 eV range, and core-level spectra were recorded for each sample.

**Field emission scanning electron microscopy (FESEM) and energy dispersive spectrometry (EDS) mapping.** FESEM images were collected ZEISS Gemini SEM – Field Emission Scanning Electron Microscope and Energy Dispersive Spectrometry (EDS) images were collected on OXFORD ULTIM MAX-40.

**Photoluminescence spectroscopy.** Photoluminescence spectrum was measured on FLS1000 Spectrometer of Edinburgh Instruments, equipped with 450 W ozone free Xenon arc lamp as the excitation source and visible PMT 900 (250 nm – 900 nm) detector.

**Thermogravimetric analysis (TGA).** The TGA data of all the compounds were collected under an inert nitrogen atmosphere on a Mettler Toledo TGA 1 STAR<sup>e</sup> instrument.

**Differential scanning calorimetry (DSC).** Mettler Toledo DSC 3 STAR<sup>e</sup> calorimeter was used to collect DSC with a 10 K/min ramp rate in a nitrogen atmosphere.

**Table S1.** Comparison of reported Dion-Jacobson type 2D A'SnBr<sub>4</sub> and A'SnI<sub>4</sub> perovskites.<sup>a</sup>

| Compound                   | $\Delta d$              | $\sigma^2$ | Interlayer Spacing (Å) | Experimental Bandgap (eV) | Ref |
|----------------------------|-------------------------|------------|------------------------|---------------------------|-----|
| (1,8-ODA)SnBr <sub>4</sub> | 8.18 x 10 <sup>-5</sup> | 3.69       | 13.426                 | Not available             | S4  |

|                                                                                                                 |                                                         |                   |        |               |           |
|-----------------------------------------------------------------------------------------------------------------|---------------------------------------------------------|-------------------|--------|---------------|-----------|
| (1,4-BDA)SnBr <sub>4</sub>                                                                                      | 4.462 x 10 <sup>-3</sup>                                | 18.6252           | 9.549  | 2.64          | This work |
| [C <sub>5</sub> H <sub>11</sub> N(CH <sub>2</sub> ) <sub>2</sub> NH <sub>3</sub> ]SnI <sub>4</sub>              | 3.16 X 10 <sup>-3</sup>                                 | 26.29             | 10.364 | Not available | S5        |
| [NH <sub>3</sub> (CH <sub>2</sub> ) <sub>5</sub> NH <sub>3</sub> ]SnI <sub>4</sub>                              | 2.82 X 10 <sup>-4</sup>                                 | 2.416             | 10.216 | Not available | S5        |
| [C <sub>3</sub> H <sub>4</sub> N <sub>2</sub> (CH <sub>2</sub> ) <sub>2</sub> NH <sub>3</sub> ]SnI <sub>4</sub> | 1.15 X 10 <sup>-3</sup>                                 | 9.649             | 10.022 | 1.67          | S6        |
| [(CH <sub>3</sub> ) <sub>3</sub> N(CH <sub>2</sub> ) <sub>2</sub> NH <sub>3</sub> ]SnI <sub>4</sub>             | 2.704 x 10 <sup>-5</sup>                                | 2.12              | 10.129 | 1.97          | S7        |
| [(C <sub>3</sub> H <sub>6</sub> N <sub>2</sub> ) <sub>2</sub> ]SnI <sub>4</sub>                                 | 6.32 X 10 <sup>-3</sup>                                 | 22.90             | 9.492  | Not available | S8        |
| [C <sub>8</sub> H <sub>8</sub> N <sub>4</sub> ]SnI <sub>4</sub>                                                 | 1.963 X 10 <sup>-7</sup>                                | 8.625             | 10.597 | 1.79          | S9        |
| (1,4-BDA)SnI <sub>4</sub>                                                                                       | 7.448 X 10 <sup>-6</sup> ,<br>3.0043 X 10 <sup>-6</sup> | 3.3198,<br>3.1313 | 10.181 | 1.94          | This work |

<sup>a</sup>Only phases with crystallographic data are listed.

**Table S2.** Single crystal data and structure refinement details of (1,4-BDA)SnBr<sub>6</sub>.

|                                                     |                                                                                                   |
|-----------------------------------------------------|---------------------------------------------------------------------------------------------------|
| CCDC No.                                            | 2303742                                                                                           |
| Empirical formula                                   | (1,4BDA)SnBr <sub>6</sub>                                                                         |
| Formula weight                                      | 688.28                                                                                            |
| Temperature                                         | 273(2) K                                                                                          |
| Crystal system                                      | Monoclinic                                                                                        |
| Space group                                         | <i>P</i> 2 <sub>1</sub> / <i>m</i>                                                                |
| Unit cell dimensions                                | a = 10.1731(4) Å    α = 90°<br>b = 7.5558(3) Å    β = 99.2730(10)°<br>c = 10.3974(4) Å    γ = 90° |
| Volume                                              | 788.76(5) Å <sup>3</sup>                                                                          |
| Z                                                   | 2                                                                                                 |
| Density (calculated)                                | 2.839 mg/m <sup>3</sup>                                                                           |
| Absorption coeff.                                   | 16.785 mm <sup>-1</sup>                                                                           |
| θ range                                             | 2.028 to 27.107 °                                                                                 |
| Reflections collected                               | 13694                                                                                             |
| Independent reflections                             | 1876 [R(int) = 0.0784]                                                                            |
| Data completeness                                   | 99.9 %                                                                                            |
| Data/restraints /parameters                         | 1876 / 0 / 76                                                                                     |
| GoF on <i>F</i> <sup>2</sup>                        | 1.023                                                                                             |
| Final <i>R</i> indices [ <i>I</i> > 2σ( <i>I</i> )] | <i>R</i> 1 = 0.0577, <i>wR</i> 2 = 0.1727                                                         |
| <i>R</i> indices (all data)                         | <i>R</i> 1 = 0.0680, <i>wR</i> 2 = 0.1844                                                         |

**Table S3.** Single crystal data and structure refinement details of (1,4-BDA)SnBr<sub>4</sub>.

|                   |                           |
|-------------------|---------------------------|
| CCDC No.          | 2303743                   |
| Empirical formula | (1,4BDA)SnBr <sub>4</sub> |

|                                                     |                                                                                                    |
|-----------------------------------------------------|----------------------------------------------------------------------------------------------------|
| Formula weight                                      | 528.48                                                                                             |
| Temperature                                         | 300(2) K                                                                                           |
| Crystal system                                      | Monoclinic                                                                                         |
| Space group                                         | <i>C</i> 2/c                                                                                       |
| Unit cell dimensions                                | a = 11.6179(5) Å    α = 90°<br>b = 11.8042(5) Å    β = 100.415(2) °<br>c = 19.4177(8) Å    γ = 90° |
| Volume                                              | 2619.07(19)Å <sup>3</sup>                                                                          |
| Z                                                   | 8                                                                                                  |
| Density (calculated)                                | 2.681 mg/m <sup>3</sup>                                                                            |
| Absorption coeff.                                   | 14.113 mm <sup>-1</sup>                                                                            |
| θ range                                             | 2.133 to 27.100 °                                                                                  |
| Reflections collected                               | 21599                                                                                              |
| Independent reflections                             | 2900 [R(int) = 0.1354]                                                                             |
| Data completeness                                   | 100.0 %                                                                                            |
| Data/restraints /parameters                         | 2900 / 0 / 104                                                                                     |
| GoF on <i>F</i> <sup>2</sup>                        | 0.970                                                                                              |
| Final <i>R</i> indices [ <i>I</i> > 2σ( <i>I</i> )] | <i>R</i> 1 = 0.0432, <i>wR</i> 2 = 0.0654                                                          |
| <i>R</i> indices (all data)                         | <i>R</i> 1 = 0.0956, <i>wR</i> 2 = 0.0777                                                          |

**Table S4.** Single crystal data and structure refinement details of (1,4-BDA)SnI<sub>4</sub>.

|                                      |                                                                                                                                                                               |
|--------------------------------------|-------------------------------------------------------------------------------------------------------------------------------------------------------------------------------|
| CCDC No.                             | 2303744                                                                                                                                                                       |
| Empirical formula                    | (1,4BDA)SnI <sub>4</sub>                                                                                                                                                      |
| Formula weight                       | 179.12                                                                                                                                                                        |
| Temperature                          | 299(2) K                                                                                                                                                                      |
| Crystal system                       | Triclinic                                                                                                                                                                     |
| Space group                          | $P\bar{1}$                                                                                                                                                                    |
| Unit cell dimensions                 | $a = 8.4665(8) \text{ \AA}$ $\alpha = 77.434(3)^\circ$<br>$b = 8.8203(7) \text{ \AA}$ $\beta = 68.287(3)^\circ$<br>$c = 11.2697(10) \text{ \AA}$ $\gamma = 89.901(3)^\circ$ . |
| Volume                               | 760.26(12) $\text{\AA}^3$                                                                                                                                                     |
| Z                                    | 8                                                                                                                                                                             |
| Density (calculated)                 | 3.130 $\text{mg/m}^3$                                                                                                                                                         |
| Absorption coeff.                    | 9.766 $\text{mm}^{-1}$                                                                                                                                                        |
| $\theta$ range                       | 2.000 to 27.273 $^\circ$                                                                                                                                                      |
| Reflections collected                | 26535                                                                                                                                                                         |
| Independent reflections              | 3404 [R(int) = 0.0931]                                                                                                                                                        |
| Data completeness                    | 100.0 %                                                                                                                                                                       |
| Data/restraints /parameters          | 3404 / 0 / 105                                                                                                                                                                |
| GoF on $F^2$                         | 1.079                                                                                                                                                                         |
| Final R indices [I > 2 $\sigma$ (I)] | R1 = 0.0459, wR2 = 0.1288                                                                                                                                                     |
| R indices (all data)                 | R1 = 0.0611, wR2 = 0.1377                                                                                                                                                     |

**Table S5.** Bond distances & bond angles as obtained from the SCXRD data of the compounds reported in this study. We have also included nonbonding N-H····X distances.

|                                                                                                                                                                                |                                                                                                                                                                                                                                                                                                           |
|--------------------------------------------------------------------------------------------------------------------------------------------------------------------------------|-----------------------------------------------------------------------------------------------------------------------------------------------------------------------------------------------------------------------------------------------------------------------------------------------------------|
| <b>(1,4-BDA)SnBr<sub>6</sub></b>                                                                                                                                               |                                                                                                                                                                                                                                                                                                           |
| <i>Bond lengths</i> (Å)                                                                                                                                                        | <i>Bond angles</i> (°)                                                                                                                                                                                                                                                                                    |
| Sn(1)-Br(1) = 2.6076(9) x 2<br>Sn(1)-Br(2) = 2.6252(15)<br>Sn(1)-Br(3) = 2.5797(8) x 2<br>Sn(1)-Br(4) = 2.5989(13)                                                             | Br(4)-Sn(1)-Br(3) = 90.61(4)<br>Br(3)-Sn(1)-Br(3) = 92.41(4)<br>Br(1)-Sn(1)-Br(3) = 88.69(3) x 2<br>Br(1)-Sn(1)-Br(1) = 90.20(4) x 2<br>Br(2)-Sn(1)-Br(1) = 88.66(4)<br>Br(2)-Sn(1)-Br(3) = 90.59(4)<br>Br(4)-Sn(1)-Br(1) = 90.11(4) x 2                                                                  |
| <b>(1,4-BDA)SnBr<sub>4</sub></b>                                                                                                                                               |                                                                                                                                                                                                                                                                                                           |
| <i>Bond lengths</i> (Å)                                                                                                                                                        | <i>Bond angles</i> (°)                                                                                                                                                                                                                                                                                    |
| Sn(1)-Br(1) = 2.7902(10)<br>Sn(1)-Br(2) = 2.9752(6)<br>Sn(1)-Br(3) = 3.1970(12)<br>Sn(1)-Br(4) = 2.9808(6)<br>Sn(1)-Br(5) = 3.3009(9)<br>Sn(1)-Br(5) = 2.7426(9)               | Br(5)-Sn(1)-Br(3) = 100.40(3) & 84.17(3)<br>Br(5)-Sn(1)-Br(2) = 89.32(4) & 87.89(4)<br>Br(5)-Sn(1)-Br(4) = 92.43(4) & 90.00(4)<br>Br(5)-Sn(1)-Br(1) = 88.34(4) & 86.98(3)<br>Br(4)-Sn(1)-Br(3) = 91.83(3)<br>Br(3)-Sn(1)-Br(2) = 92.48(3)<br>Br(1)-Sn(1)-Br(4) = 90.85(3)<br>Br(1)-Sn(1)-Br(2) = 84.54(3) |
| <i>N-H····Br distances</i> (Å)                                                                                                                                                 |                                                                                                                                                                                                                                                                                                           |
| N(1)-Br(1) = 3.418(8)<br>N(1)-Br(3) = 3.366(8)<br>N(1)-Br(5) = 3.605(9)<br>N(2)-Br(1) = 3.446(6)<br>N(2)-Br(2) = 3.497(6)<br>N(2)-Br(3) = 3.373(6)<br>N(2)-Br(5) = 3.591(7)    |                                                                                                                                                                                                                                                                                                           |
| <b>(1,4-BDA)SnI<sub>4</sub></b>                                                                                                                                                |                                                                                                                                                                                                                                                                                                           |
| <i>Bond lengths</i> (Å)                                                                                                                                                        | <i>Bond angles</i> (°)                                                                                                                                                                                                                                                                                    |
| Sn(1)-I(1) = 3.1439(7), 3.1440(7)<br>Sn(1)-I(3) = 3.1641(6)<br>Sn(1)-I(4) = 3.1596(6)<br>Sn(2)-I(2) = 3.1485(7), 3.1486(7)<br>Sn(2)-I(3) = 3.1610(6)<br>Sn(2)-I(4) = 3.1592(6) | I(1)-Sn(1)-I(3) = 90.068(19) & 89.932(19)<br>I(1)-Sn(1)-I(4) = 87.030(19) & 92.970(19)<br>I(2)-Sn(2)-I(3) = 87.153(19) & 92.847(19)<br>I(2)-Sn(2)-I(4) = 90.127(19) & 89.873(19)                                                                                                                          |
| <i>N-H····I distances</i> (Å)                                                                                                                                                  |                                                                                                                                                                                                                                                                                                           |
| N(1)-I(1) = 3.675(11)<br>N(1)-I(2) = 3.586(13)<br>N(1)-I(3) = 3.658(10)<br>N(2)-I(2) = 3.621(10)<br>N(2)-I(4) = 3.694(12)<br>N(2)-I(3) = 3.988(11)                             |                                                                                                                                                                                                                                                                                                           |



**Bond length deviation ( $\Delta d$ )** : It was calculated using the below formula:<sup>S10</sup>

$$\Delta d = \frac{1}{6} \sum_i \left[ \frac{d_i - d}{d} \right]^2$$

where  $d_i$  is the length of  $i^{\text{th}}$  M-X bond;  $d$  is the averaged M-X bond length.

**Bond angle variance ( $\sigma^2$ )** : It was calculated using the below formula:<sup>S11</sup>

$$\sigma^2 = \sum_i \frac{1}{11} (\theta_i - 90)^2$$

where  $\theta_i$  is the  $i^{\text{th}}$  X-M-X bond angle.

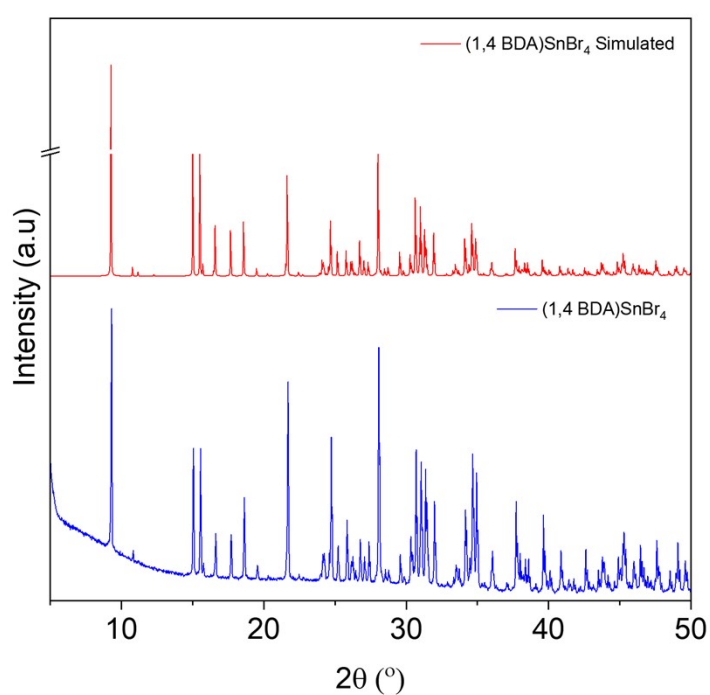

**Fig. S1.** Simulated and experimental powder X-ray diffraction patterns of (1,4-BDA)SnBr<sub>4</sub>.

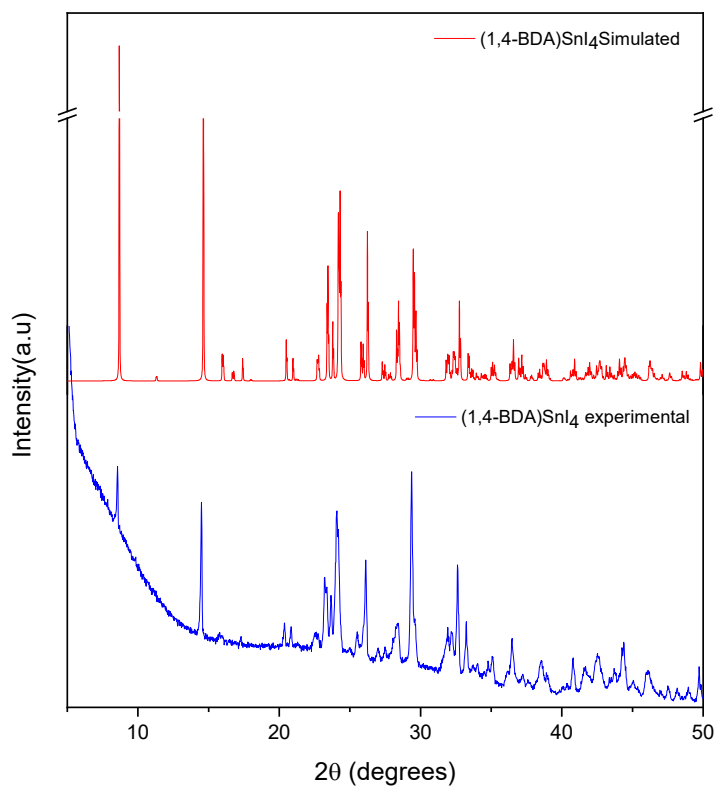

**Fig. S2.** Simulated and experimental powder X-ray diffraction patterns of (1,4-BDA)SnI<sub>4</sub>.

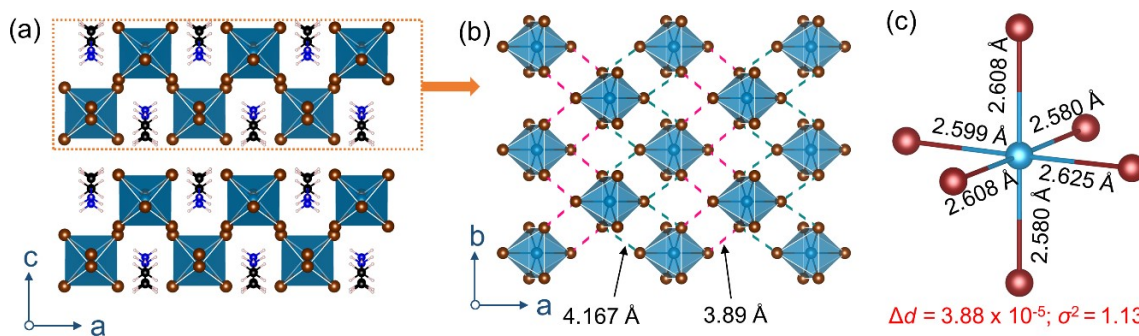

**Fig. S3.** Single-crystal structure of (1,4-BDA)SnBr<sub>6</sub>: (a) Packing diagram viewed along the *b*-axis. (b) Arrangement of [SnBr<sub>6</sub>]<sup>2-</sup> octahedra in the *ab*-plane, showing the nearest neighbour Br···Br distance by green and red dashed lines (1,4-BDA) molecules are shown for sake of clarity). (c) An [SnBr<sub>6</sub>]<sup>2-</sup> octahedron showing the Sn-Br bond lengths (values for the bond length deviation & bond angle variance indices are also provided).

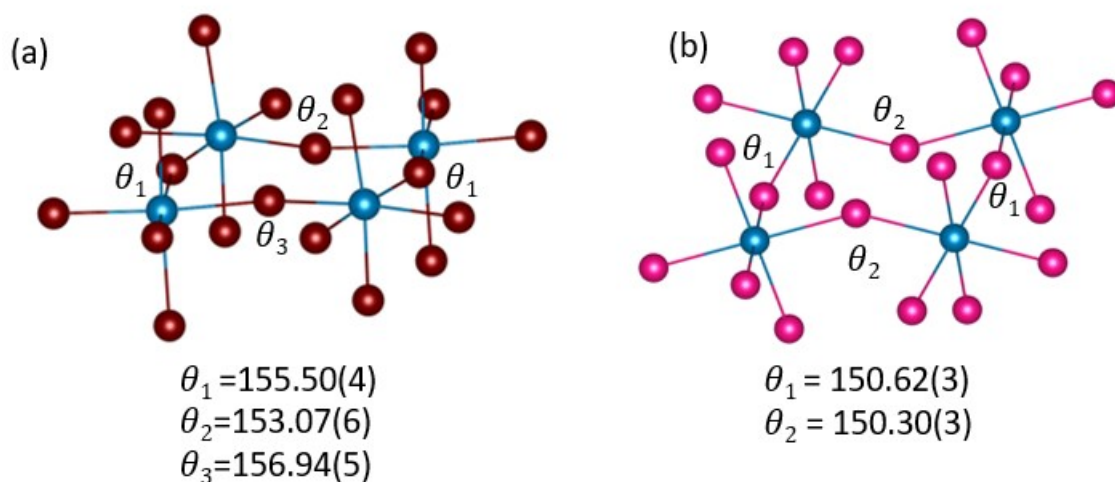

**Fig. S4.** (a) and (b) are Ball and Stick model of the perovskite layer illustrating the connection between the  $(\text{SnBr}_6)^+$  and  $(\text{SnI}_6)^+$  and corresponding M-X-M bond angles in (1,4-BDA) $\text{SnBr}_4$  and (1,4-BDA) $\text{SnI}_4$  respectively.

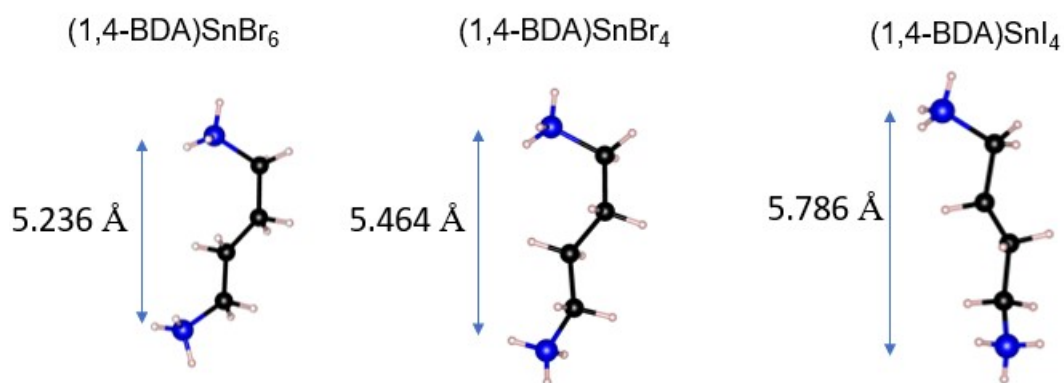

**Fig. S5.** Orientation of BDA in three different structures reported in this study, the distance between the  $\text{NH}_3^+$  terminals are also given for comparison.

**Table S6.** Elemental ratio (atomic %) obtained from the EDS spectra.

| Compound                  | C     | N     | Sn   | Br    | I     |
|---------------------------|-------|-------|------|-------|-------|
| (1,4-BDA) $\text{SnBr}_4$ | 51.46 | 22.86 | 5.38 | 20.31 | -     |
| (1,4-BDA) $\text{SnI}_4$  | 67.70 | 7.43  | 5.33 | -     | 19.54 |

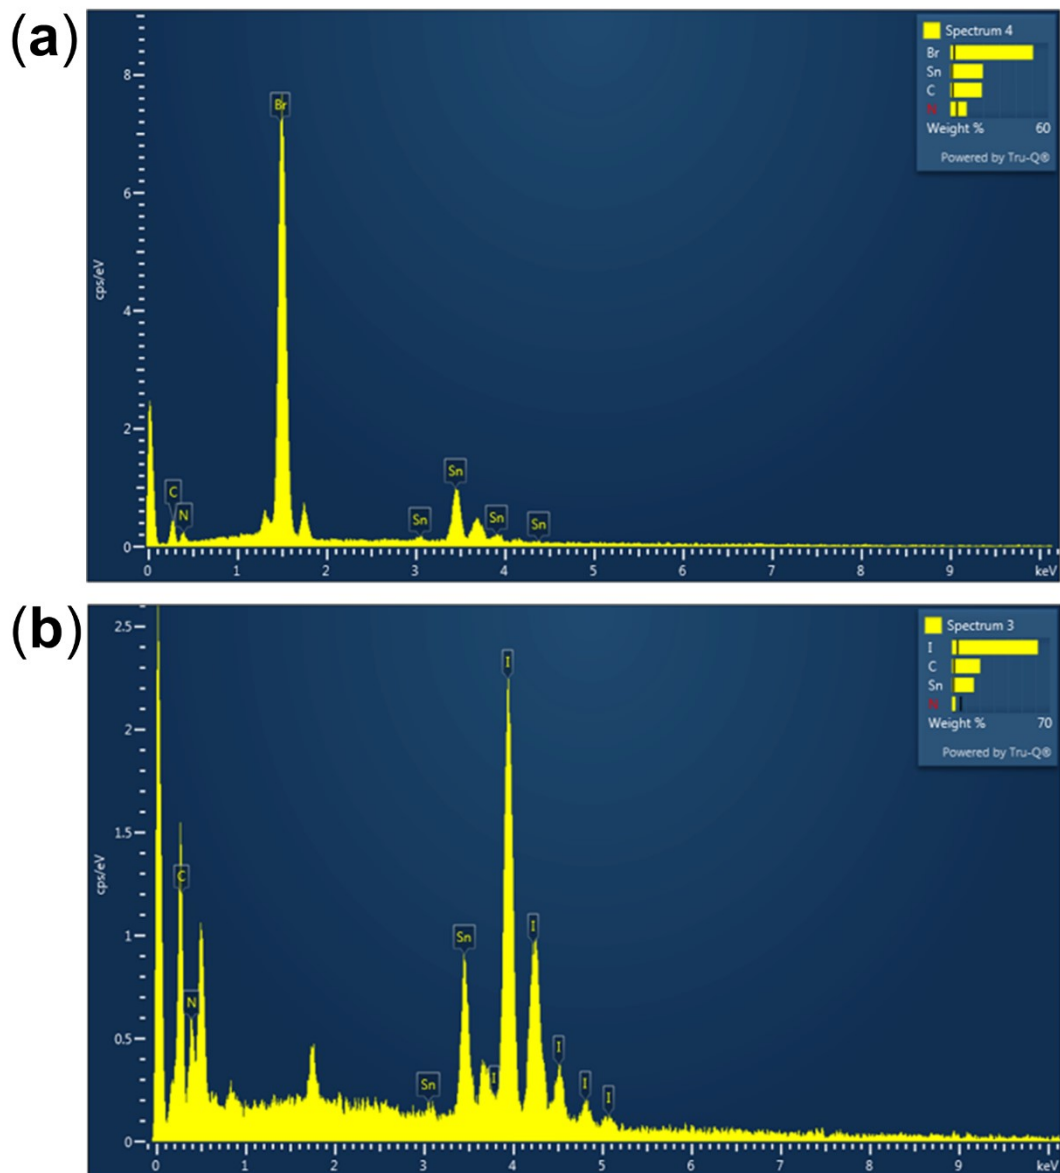

**Fig. S6.** Energy-dispersive X-ray spectra of (a) (1,4-BDA)SnBr<sub>4</sub> and (b) (1,4-BDA)SnI<sub>4</sub>.

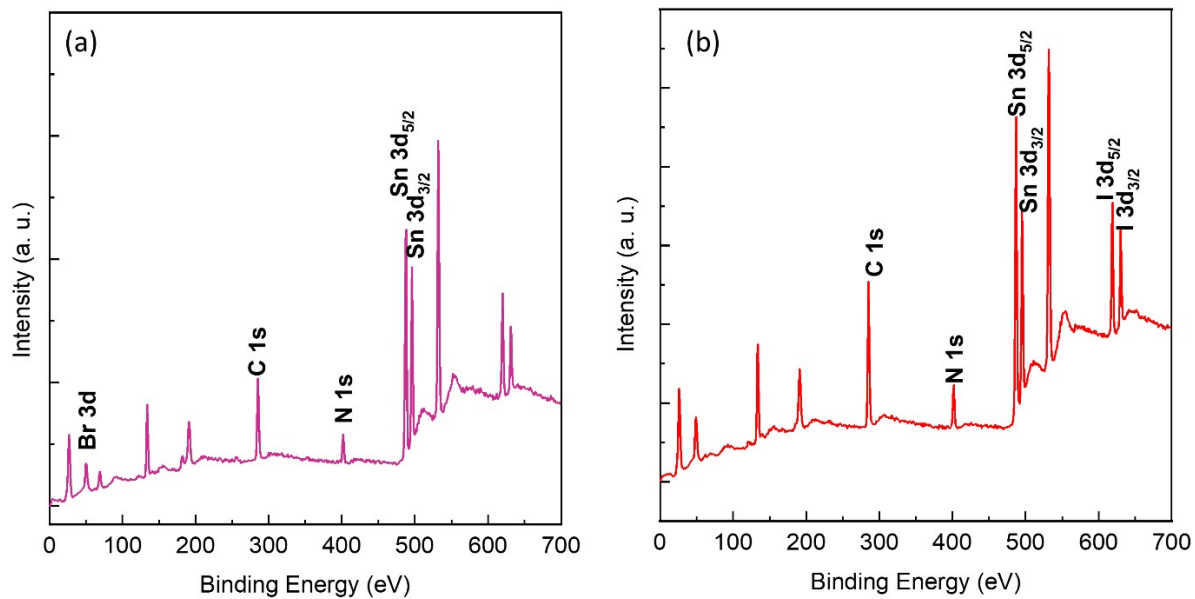

**Fig. S7.** XPS survey spectra of (a) (1,4-BDA)SnBr<sub>4</sub> and (b) (1,4-BDA)SnI<sub>4</sub>.

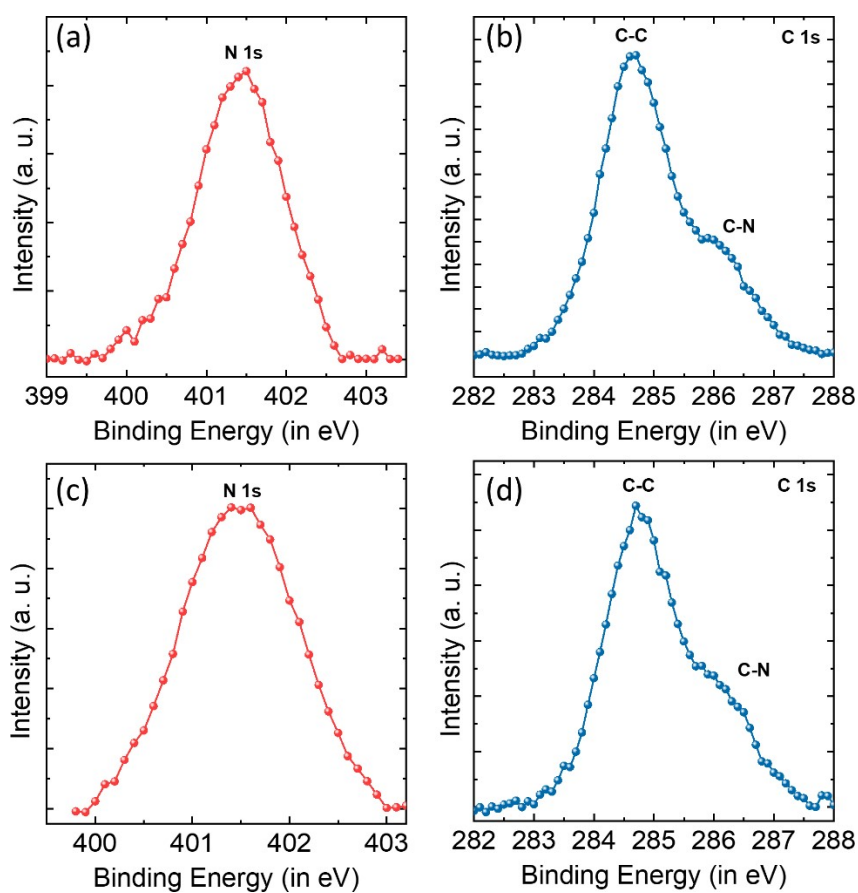

**Fig. S8.** (a) & (b) Core level N1s and C1s XPS spectra of (1,4-BDA)SnBr<sub>4</sub>. (c) & (d) Core level N1s and C1s XPS spectra of (1,4-BDA)SnI<sub>4</sub>.

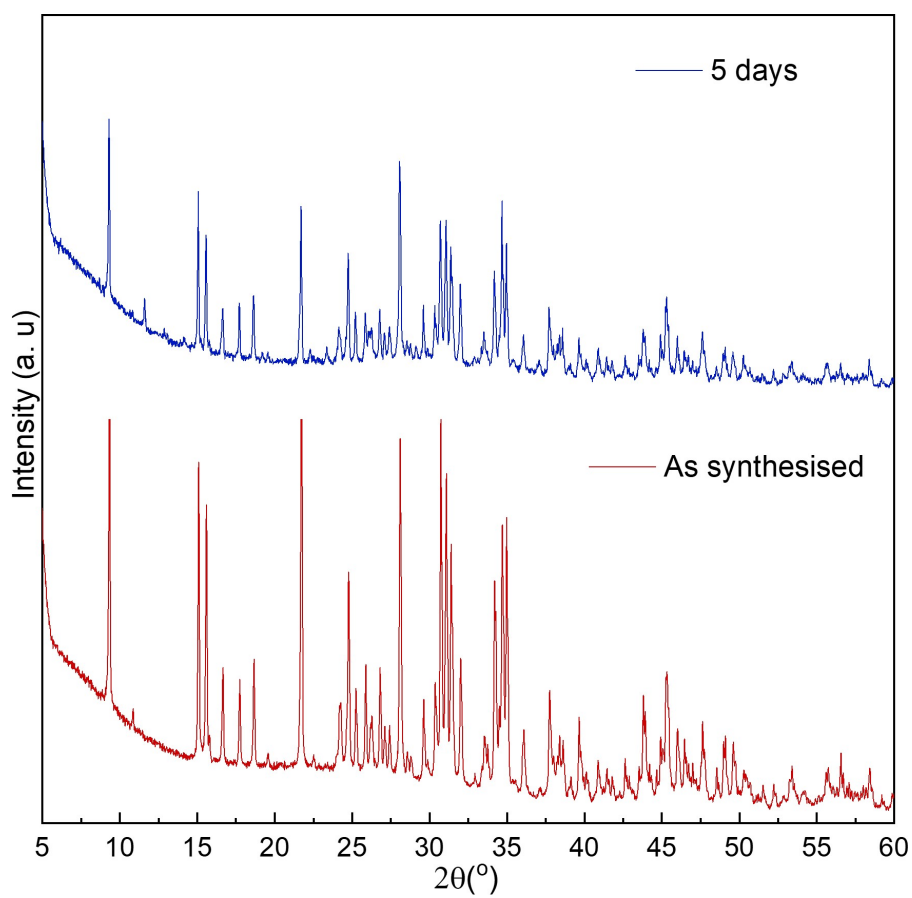

**Fig. S9.** PXRD pattern comparing the ambient stabilities of (1,4-BDA)SnBr<sub>4</sub>.

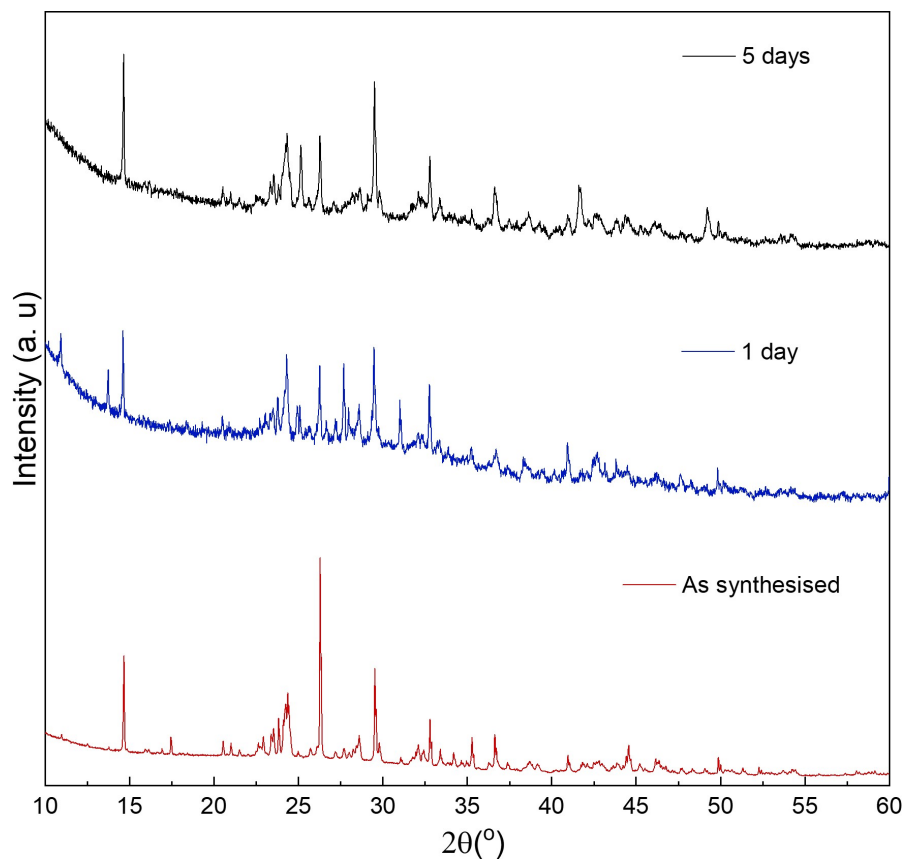

**Fig. S10.** PXRD pattern comparing the ambient stabilities of (1,4-BDA)SnI<sub>4</sub>.

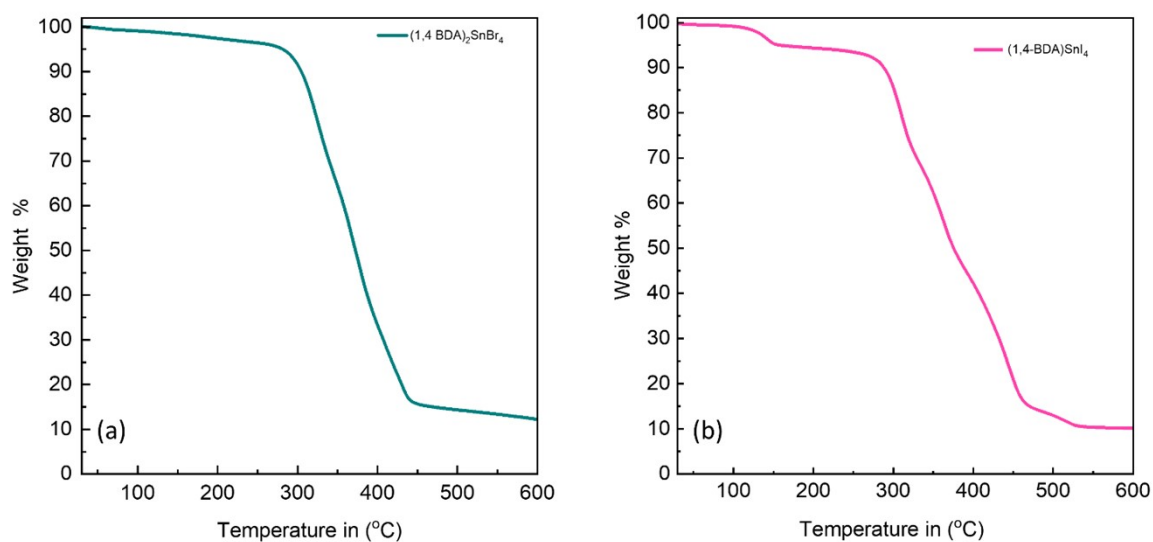

**Fig. S11.** TGA curves of (a) (1,4-BDA)SnBr<sub>4</sub> and (b) (1,4-BDA)SnI<sub>4</sub>.

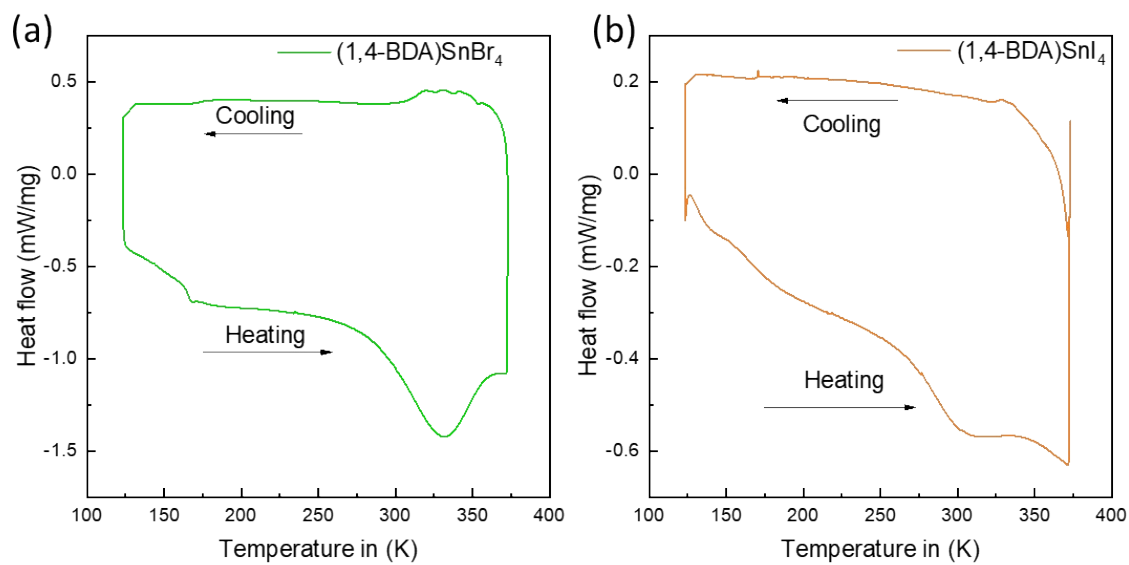

**Figure S12.** DSC plots of (a) (1,4-BDA)SnBr<sub>4</sub> and (b) (1,4-BDA)SnI<sub>4</sub>.

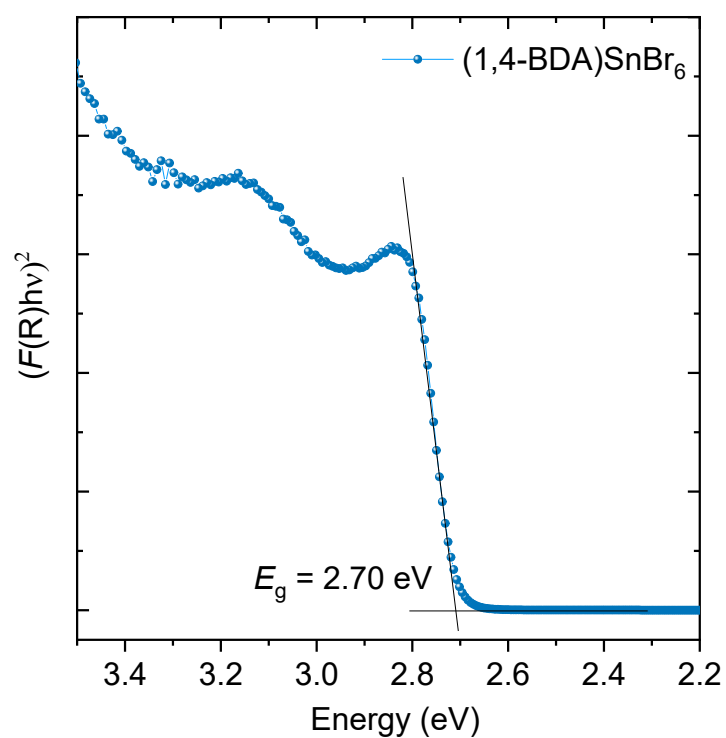

**Fig. S13.** Tauc plot for (1,4-BDA)SnBr<sub>6</sub>.



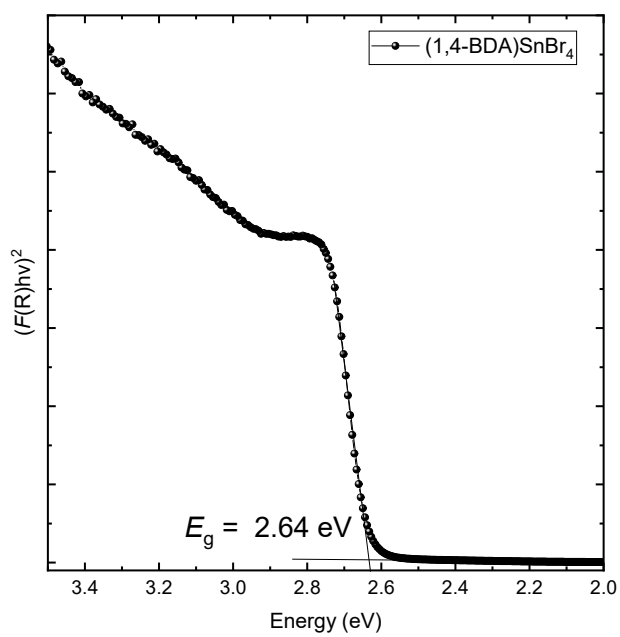

**Fig. S14.** Tauc plot for (1,4-BDA)SnBr<sub>4</sub>.

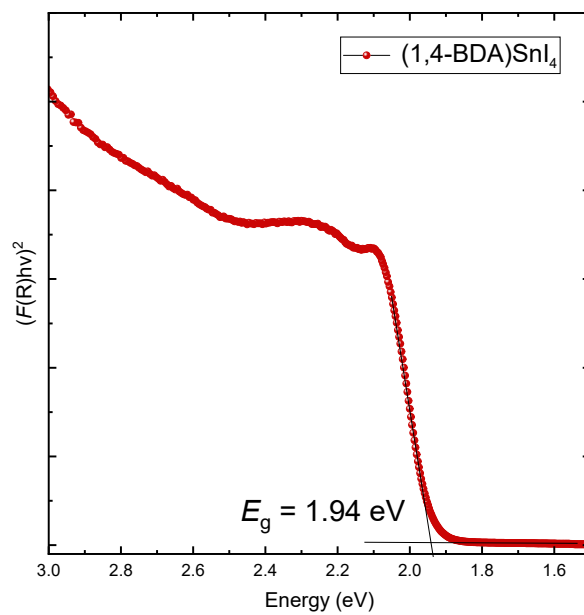

**Fig. S15.** Tauc plot of (1,4-BDA)SnI<sub>4</sub>.

## References

- S1 G. M. Sheldrick, *Acta Crystallogr. Sect. A Found. Adv.*, 2015, **71**, 3–8.
- S2 O. V. Dolomanov, L. J. Bourhis, R. J. Gildea, J. A. K. Howard and H. Puschmann, *J. Appl. Crystallogr.*, 2009, **42**, 339–341.
- S3 K. Momma and F. Izumi, *J. Appl. Crystallogr.*, 2011, **44**, 1272–1276.
- S4 S. Wang, J. Popović, S. Burazer, A. Portniagin, F. Liu, K.-H. Low, Z. Duan, Y. Li, Y. Xiong, Y. Zhu, S. V Kershaw, A. B. Djurišić and A. L. Rogach, *Adv. Funct. Mater.*, 2021, **31**, 2102182.
- S5 Y. Takahashi, R. Obara, K. Nakagawa, M. Nakano, J. Tokita and T. Inabe, *Chem. Mater.*, 2007, **19**, 6312–6316.
- S6 L. Mao, H. Tsai, W. Nie, L. Ma, J. Im, C. C. Stoumpos, C. D. Malliakas, F. Hao, M. R. Wasielewski, A. D. Mohite and M. G. Kanatzidis, *Chem. Mater.*, 2016, **28**, 7781–7792.
- S7 Z. Xu, D. B. Mitzi and D. R. Medeiros, *Inorg. Chem.*, 2003, **42**, 1400–1402.
- S8 Z. Tang, J. Guan and A. M. Guloy, *J. Mater. Chem.*, 2001, **11**, 479–482.
- S9 I. Zimmermann, S. Aghazada and M. K. Nazeeruddin, *Angew. Chem. Int. Ed.*, 2019, **58**, 1072–1076.
- S10 B. Sun, X.-F. Liu, X.-Y. Li, Y. Zhang, X. Shao, D. Yang and H.-L. Zhang, *Chem. Mater.*, 2020, **32**, 8914–8920.
- S11 K. Robinson, G. V Gibbs and P. H. Ribbe, *Science*, 1971, **172**, 567–570.
